# Supplementary material
Source: publisher figshare collection journal article supplement (https://future-science-group.figshare.com/ndownloader/files/33851495)

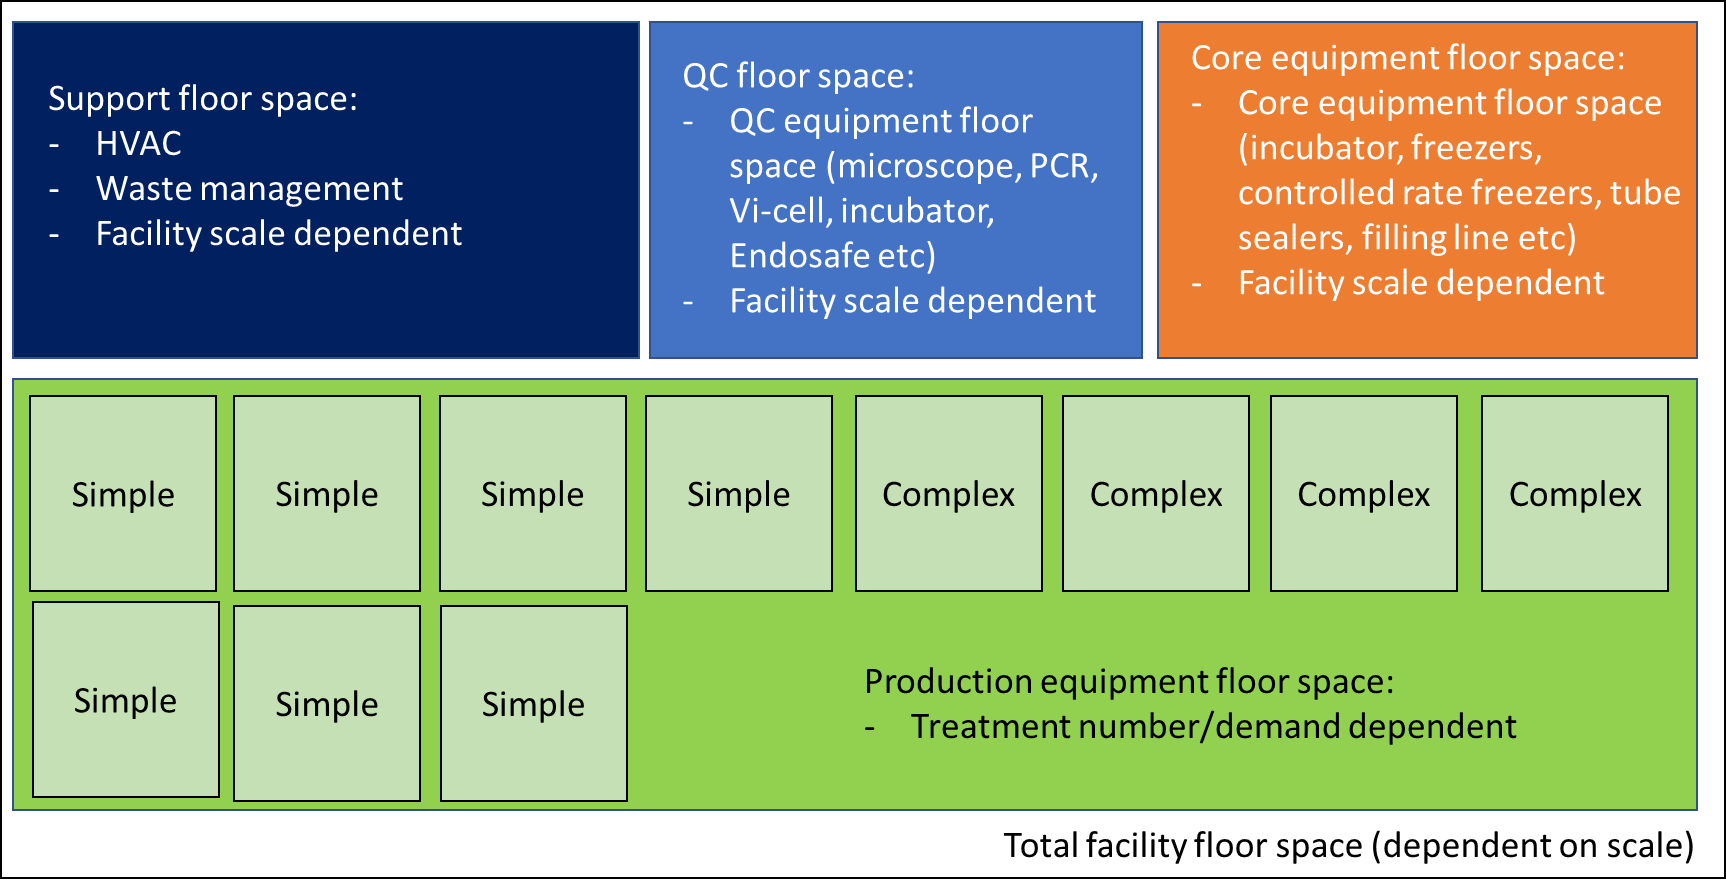


Supplementary Material 2 Facility floor plan schematic

Supplement: Supplementary file 1 [file 33851495]
